# Supplementary material
Source: HighWire-hosted journal article supplement (https://erj.ersjournals.com/content/56/2/2002430)
Supplement: inline-supplementary-material-1 [file inline-supplementary-material-1.pdf]

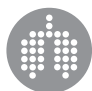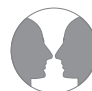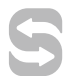

SHAREABLE PDF

# Turbocharged Juul device challenges European tobacco regulators

Sairam V. Jabba <sup>1</sup> and Sven-Eric Jordt <sup>1,2,3</sup>

**Affiliations:** <sup>1</sup>Dept of Anesthesiology, Duke University School of Medicine, Durham, NC, USA. <sup>2</sup>Dept of Pharmacology and Cancer Biology, Duke University School of Medicine, Durham, NC, USA. <sup>3</sup>Duke University Integrated Toxicology and Environmental Health Program (ITEHP), Durham, NC, USA.

**Correspondence:** Sven-Eric Jordt, Dept of Anesthesiology, Duke University School of Medicine, 3 Genome Ct, Durham, NC 27710-3094, USA. E-mail: sven.jordt@duke.edu

@ERSpublications

**Juul, the e-cigarette company, re-engineered their device for the European market, increasing nicotine delivery to US levels and adding a synthetic cooling agent to replace menthol. This approach takes advantage of insufficient EU tobacco regulation.** <https://bit.ly/3iixAhU>

**Cite this article as:** Jabba SV, Jordt S-E. Turbocharged Juul device challenges European tobacco regulators. *Eur Respir J* 2020; 56: 2002430 [<https://doi.org/10.1183/13993003.02430-2020>].

This single-page version can be shared freely online.

## *To the Editor:*

In October 2019 an executive sacked by the electronic cigarette company, Juul, filed a lawsuit against his former employer alleging a cover-up of the sale of one million e-cigarette pods filled with contaminated flavoured nicotine liquids [1, 2]. The lawsuit also claimed that Juul was developing a “Turbo” version of their product for markets that limit nicotine levels. A new study by a team of the German Institute for Risk Assessment (BfR) revealed that “Turbo” Juul devices have, in fact, been marketed in Europe since summer 2019 [3].
